# Supplementary material for: Paediatric Partial-Thickness Burn Therapy: A Meta-Analysis and Systematic Review of Randomised Controlled Trials
Source: MDPI journal article supplement (doi:10.3390/life12050619), 2022-04-21
Supplement: s1 [file s1]

| <b>Depth: II/A + MD</b> | <b>Publication data</b>             | <b>No. of patients</b> | <b>TTRE (days)</b> |           |
|-------------------------|-------------------------------------|------------------------|--------------------|-----------|
| <b>Intervention</b>     | <b>Author (year of publication)</b> |                        | <b>mean</b>        | <b>SD</b> |
| <b>SSD SUM</b>          |                                     | <b>31</b>              | <b>14.74</b>       |           |
| SSD                     | <b>Caruso et al. (2006)</b>         | 19                     | 16                 | NR        |
| SSD                     | <b>Glat et al. (2009)</b>           | 12                     | 12.75              | 7.45      |
| <b>Aquacel Ag</b>       | <b>Caruso et al. (2006)</b>         | <b>13</b>              | <b>14</b>          | NR        |
| <b>Silvasorb</b>        | <b>Glat et al. (2009)</b>           | <b>12</b>              | <b>12.42</b>       | 3.58      |
| <b>Biobrane</b>         | <b>Cassidy et al. (2005)</b>        | <b>35</b>              | <b>12.24</b>       | 5.1       |
| <b>Duoderm</b>          | <b>Cassidy et al. (2005)</b>        | <b>37</b>              | <b>11.21</b>       | 6.5       |
