# Supplementary material for: Paediatric Partial-Thickness Burn Therapy: A Meta-Analysis and Systematic Review of Randomised Controlled Trials
Source: MDPI journal article supplement (doi:10.3390/life12050619), 2022-04-21
Supplement: s1 [file s1]

| Intervention             | Publication data                | No.<br>of<br>pati<br>ents | LOS (days)   |       |
|--------------------------|---------------------------------|---------------------------|--------------|-------|
|                          | Author (year of publication)    |                           | mean         | SD    |
| <b>Biobrane+Acticoat</b> | <b>Muganza et al. (2014)</b>    | <b>26</b>                 | <b>27.77</b> | 25.93 |
| <b>Autograft</b>         | <b>Omranifard et al. (2011)</b> | <b>32</b>                 | <b>20.2</b>  | 10.3  |
| <b>SSD II</b>            |                                 | <b>130</b>                | <b>13.77</b> |       |
| <b>AM II</b>             |                                 | <b>85</b>                 | <b>11.37</b> |       |
| AM                       | <b>Omranifard et al. (2011)</b> | 34                        | 12.4         | 7.6   |
| AM                       | <b>Mostaque et al. (2011)</b>   | <b>51</b>                 | 10.69        | 3.87  |
| <b>Collagenase+PMB</b>   | <b>Ostlie et al. (2012)</b>     | <b>50</b>                 | <b>11.3</b>  | 5.8   |
| <b>SSD II+II/A</b>       |                                 | <b>175</b>                | <b>10.46</b> |       |
| SSD                      | <b>Muganza et al. (2014)</b>    | 19                        | 26.83        | 21.2  |
| SSD                      | <b>Mostaque et al. (2011)</b>   | 51                        | 13.43        | 5.13  |
| SSD                      | <b>Ostlie et al. (2012)</b>     | 50                        | 11.2         | 5.2   |
| SSD                      | <b>Barret et al. (2000)</b>     | 10                        | 3.6          | NR    |
| SSD II/A                 | <b>Lal et al. (2000)</b>        | 45                        | <b>5.79</b>  | NR    |
| <b>EZDerm</b>            | <b>Karlsson et al. (2019)</b>   | <b>30</b>                 | <b>3.36</b>  | 3.94  |
| <b>Mepilex</b>           | <b>Karlsson et al. (2019)</b>   | <b>28</b>                 | <b>3.12</b>  | 2.2   |
| <b>Biobrane II+II/A</b>  |                                 | <b>44</b>                 | <b>2.36</b>  |       |
| <b>Biobrane</b>          | <b>Barret et al. (2000)</b>     | 10                        | <b>1.5</b>   | NR    |
| <b>Biobrane II/A</b>     | <b>Lal et al. (2000)</b>        | 34                        | <b>2.62</b>  | NR    |
| <b>AM+Nystatin+PMB</b>   | <b>Branski et al. (2007)</b>    | <b>53</b>                 | <b>2</b>     | 3     |
| <b>Nystatin+PMB</b>      | <b>Branski et al. (2007)</b>    | <b>49</b>                 | <b>2</b>     | 3     |
