# Supplementary material for: Paediatric Partial-Thickness Burn Therapy: A Meta-Analysis and Systematic Review of Randomised Controlled Trials
Source: MDPI journal article supplement (doi:10.3390/life12050619), 2022-04-21
Supplement: s1 [file s1]

## **S2 Text: Search keys.**

### **Search key for the Embase database**

('child'/exp OR child OR 'child' OR 'children' OR 'infant'/exp OR infant OR 'infant' OR 'newborn'/exp OR newborn OR 'neonate' OR 'baby'/exp OR baby OR 'toddler'/exp OR toddler OR 'adolescent'/exp OR adolescent OR 'adolescent' OR 'teenager' OR 'pediatric'/exp OR pediatric OR 'paediatric'/exp OR paediatric) AND ('burn'/exp OR burn OR 'scald'/exp OR scald OR 'thermal injury'/exp OR 'thermal injury' OR 'flame'/exp OR flame) AND ('partial thickness' OR 'second degree' OR 'deep partial' OR 'superficial partial' OR 'mid dermal' OR 'intermediate thickness')

### **Search key for the CENTRAL, MEDLINE (via PubMed) and**

### **Web of Science databases**

((child\* OR pediatric OR paediatric OR infant\* OR newborn\* OR baby\* OR adolescent\* OR teenager\*) AND (burn\* OR scald\* OR flame\* OR thermal injur\*) AND (second degree\* OR partial thickness\* OR deep partial\* OR superficial partial\* OR mid dermal\* OR intermediate thickness\*))
