# Supplementary material for: Paediatric Partial-Thickness Burn Therapy: A Meta-Analysis and Systematic Review of Randomised Controlled Trials
Source: MDPI journal article supplement (doi:10.3390/life12050619), 2022-04-21
Supplement: s1 [file s1]

| <b>Depth: II/A</b>            | <b>Publication data</b>             | <b>No. of patients</b> | <b>TBSA%</b> |           | <b>TTRE (days)</b> |           | <b>TBSA/TTRE</b> | <b>TTRE red%</b> |
|-------------------------------|-------------------------------------|------------------------|--------------|-----------|--------------------|-----------|------------------|------------------|
| <b>Intervention</b>           | <b>Author (year of publication)</b> |                        | <b>mean</b>  | <b>SD</b> | <b>mean</b>        | <b>SD</b> |                  |                  |
| <b>Biobrane</b>               | <b>Lal et al. (2000)</b>            | <b>34</b>              | <b>11.5</b>  | NR        | <b>23.6</b>        | 2.9       | <b>0.49</b>      |                  |
| <b>SSD SUM</b>                |                                     | <b>75</b>              | <b>10.98</b> |           | <b>20.83</b>       |           | <b>0.53</b>      |                  |
| SSD                           | <b>Lal et al. (2000)</b>            | <b>45</b>              | 11.8         | NR        | 26.5               | 2         | 0.45             |                  |
| SSD                           | <b>Mostaque et al. (2011)</b>       | <b>15</b>              | 9.39         | 4.62      | 14.2               | 0.96      | 0.66             |                  |
| SSD                           | <b>Edmar et al. (2019)</b>          | <b>15</b>              | 10.13        | 4.16      | 10.47              | 0.74      | 0.97             |                  |
| <b>Amnion</b>                 | <b>Mostaque et al. (2011)</b>       | <b>29</b>              | <b>7.39</b>  | 3.63      | <b>13.33</b>       | 0.95      | <b>0.56</b>      |                  |
| <b>Tilapia</b>                | <b>Edmar et al. (2019)</b>          | <b>15</b>              | <b>11.13</b> | 4.94      | <b>10.07</b>       | 0.46      | <b>1.11</b>      |                  |
| <b>NPWT</b>                   | <b>Shen et al. (2013)</b>           | <b>145</b>             | NR           | NR        | <b>9.2</b>         | 0.6       | NA               | <b>12.57</b>     |
| <b>rhEGF</b>                  | <b>Liang et al. (2007)</b>          | <b>30</b>              | NR           | NR        | <b>8.83</b>        | 2.48      | NA               | <b>20.16</b>     |
| <b>wIRA(75%)+VIS</b>          | <b>Illing et al. (2008)</b>         | <b>10</b>              | NR           | NR        | <b>9</b>           | NR        | NA               | <b>30.77</b>     |
|                               |                                     |                        |              |           |                    |           |                  |                  |
| <b>placebo (VIS)</b>          | <b>Illing et al. (2008)</b>         | <b>10</b>              | NR           | NR        | <b>13</b>          | NR        | NA               | NA               |
| <b>placebo (saline gauze)</b> | <b>Liang et al. (2007)</b>          | <b>30</b>              | NR           | NR        | <b>11.06</b>       | 3.05      | NA               | NA               |
| <b>TT</b>                     | <b>Shen et al. (2013)</b>           | <b>162</b>             | NR           | NR        | <b>10.1</b>        | 1.6       | NA               | NA               |
