# Supplementary material for: Paediatric Partial-Thickness Burn Therapy: A Meta-Analysis and Systematic Review of Randomised Controlled Trials
Source: MDPI journal article supplement (doi:10.3390/life12050619), 2022-04-21
Supplement: s1 [file s1]

| Intervention          | Burn depth | Publication data             | No. of patients | TBSA(%) | TTRE(days) | day 10 RE(%) | TBSA%/TTRE |
|-----------------------|------------|------------------------------|-----------------|---------|------------|--------------|------------|
|                       |            | Author (year of publication) |                 | mean    | mean       |              |            |
| SSD                   | II/A       | Edmar et al. (2019)          | 15              | 10.13   | 10.47      | 53.33        | 0.97       |
| Tilapia               |            | Edmar et al. (2019)          | 15              | 11.13   | 10.07      | 86.67        | 1.11       |
| Acticoat+Mepitel      | II         | Frear et al. (2020)          | 54              | 1.35    | 10.7       | 42.45        | 0.13       |
| SSD                   |            | Bugmann et al. (1998)        | 30              | 1.92    | 11.26      | 53.33        | 0.17       |
| NPWT+Acticoat+Mepitel |            | Frear et al. (2020)          | 44              | 1.5     | 8.71       | 68.57        | 0.17       |
| Mepitel               |            | Bugmann et al. (1998)        | 36              | 3.29    | 7.58       | 77.77        | 0.44       |
| Biobrane              |            | Wood et al. (2012)           | 4               | 8.00    | 17.75      | 83.20        | 0.63       |
| Acticoat              |            | Brown et al. (2016)          | 41              | 2.40    | NR         | 93           | NA         |
| Aquacel Ag            |            | Brown et al. (2016)          | 40              | 2.50    | NR         | 94           | NA         |
| Biobrane + ReCell     |            | Wood et al. (2012)           | 5               | 5.20    | 15         | 95           | 0.35       |
