# Supplementary material for: Paediatric Partial-Thickness Burn Therapy: A Meta-Analysis and Systematic Review of Randomised Controlled Trials
Source: MDPI journal article supplement (doi:10.3390/life12050619), 2022-04-21
Supplement: s1 [file s1]

| Depth: II/B               | Publication data             | No. of patients | TBSA(%) |      | TTRE(days) |      | TBSA%/TTRE | TTRE red% |
|---------------------------|------------------------------|-----------------|---------|------|------------|------|------------|-----------|
| Intervention              | Author (year of publication) |                 | mean    | SD   | mean       | SD   |            |           |
| AM                        | Mostaque et al. (2011)       | 22              | 2.25    | 3.14 | 21.59      | 1.44 | 0.1        |           |
| SSD SUM                   |                              | 68              | 5.48    |      | 25.69      |      | 0.21       |           |
| SSD                       | Zheng et al. (2019)          | 32              | 5.8     | 1.6  | 27.9       | 1.8  | 0.21       |           |
| SSD                       | Mostaque et al. (2011)       | 36              | 5.2     | 5.45 | 23.72      | 1.5  | 0.22       |           |
| NPWT                      | Zheng et al. (2019)          | 32              | 5.5     | 2.2  | 23.9       | 2.3  | 0.23       | 14.3      |
| rhEGF                     | Liang et al. (2007)          | 30              | NR      | NR   | 15.12      | 3.19 | NA         | 20.7      |
| rhGM-CSF                  | Jiaao et al. (2010)          | 15              | NR      | NR   | 13.47      | 1.08 | NA         | 27.9      |
|                           |                              |                 |         |      |            |      |            |           |
| placebo (saline gauze)    | Liang et al. (2007)          | 30              | NR      | NR   | 19.06      | 3.07 |            |           |
| placebo (hydrogel matrix) | Jiaao et al. (2010)          | 15              | NR      | NR   | 18.69      | 2.35 |            |           |
